# Supplementary material for: High efficiency of solution-processed inverted organic solar cells enabled by an aluminum oxide conjunction structure
Source: Royal Society of Chemistry journal article supplement (doi:10.1039/d4ee05337k), 2025-01-01
Supplement: d4ee05337k1.pdf [file d4ee05337k1.pdf]

## Supplementary Information

### **High efficiency of solution-processed inverted organic solar cells enabled by an aluminum oxide conjunction structure**

Yi Yang, Mengqi Cui, Zhengyan Jiang, Ruijia Zhang, Xinjun He, Hui Liu, Biao Zhou and Wallace C.H. Choy\*

Department of Electrical and Electronic Engineering, The University of Hong Kong, Pokfulam Road, Hong Kong, China.

\*corresponding author email: [chchoy@eee.hku.hk](mailto:chchoy@eee.hku.hk)

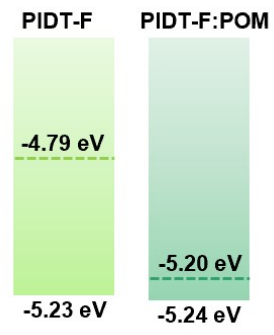

**Fig. S1.** The energy diagram of PIDT-F and PIDT-F:POM.

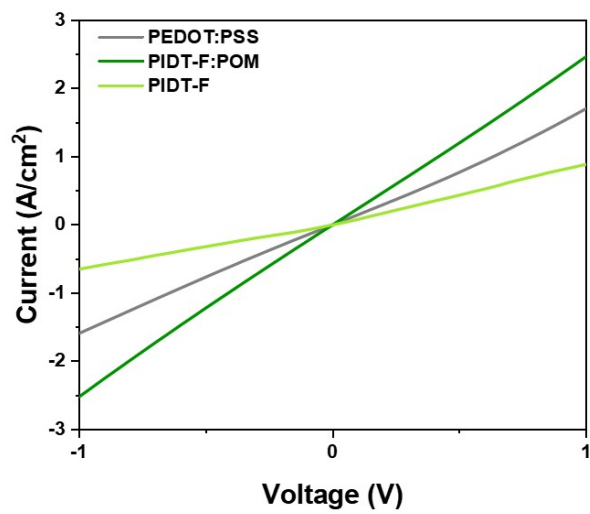

**Fig. S2.** The *J-V* characteristic of ITO/HTL/Ag.

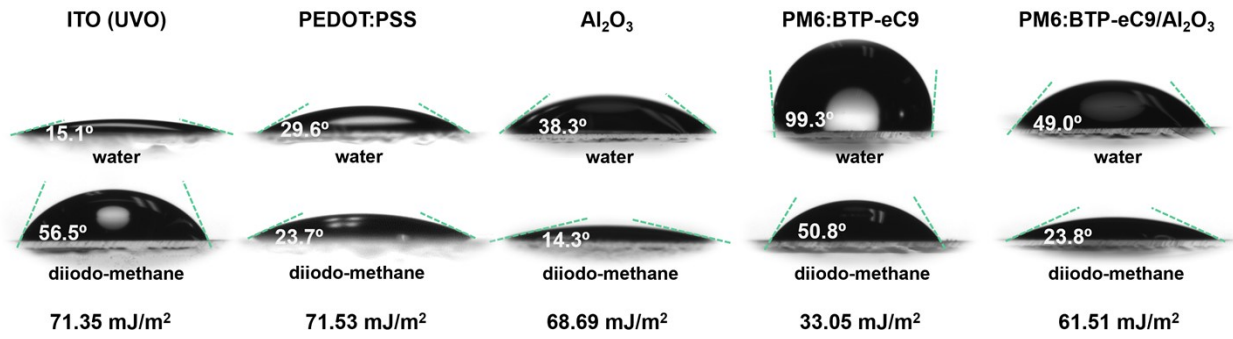

**Fig. S3.** The contact angle of water and diiodo-methane on different substrates.

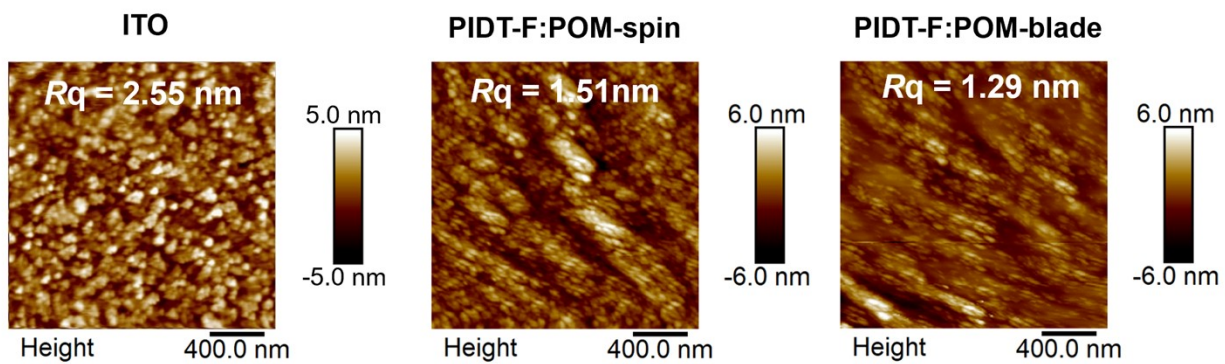

**Fig. S4.** AFM height image of ITO and ITO/spin-coated PIDT-F:POM and ITO/blade-coated PIDT-F:POM.

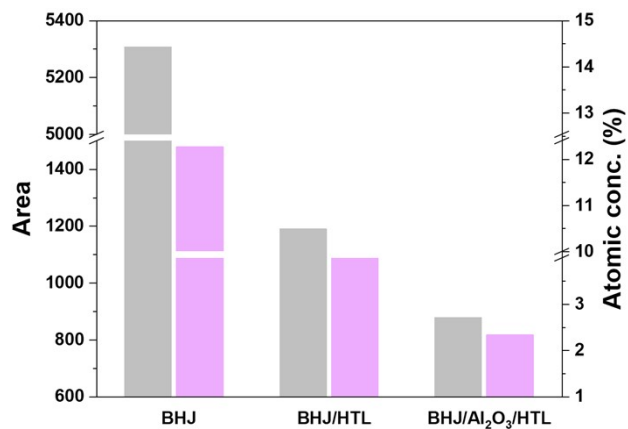

**Fig. S5.** The integral area and atomic concentration of Cl 2p of BHJ, BHJ/PIDT-F:POM and BHJ/Al<sub>2</sub>O<sub>3</sub>/PIDT-F:POM films. The atomic concentration refers to the content of Cl to total content of N, S, Cl, Al.

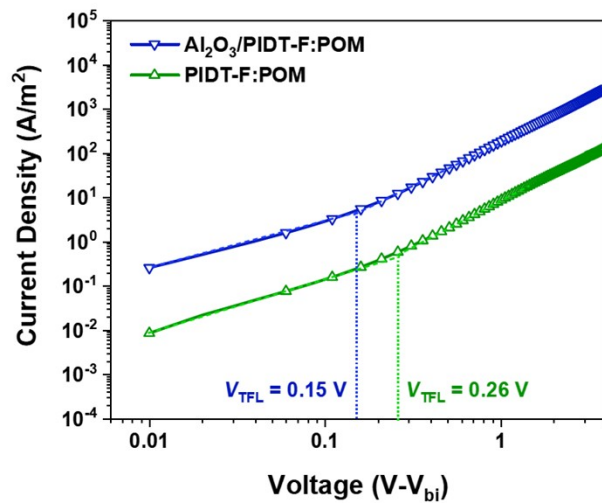

**Fig. S6.** Space charge limited current of hole-only devices based on PIDT-F:POM and Al<sub>2</sub>O<sub>3</sub>/PIDT-F:POM.

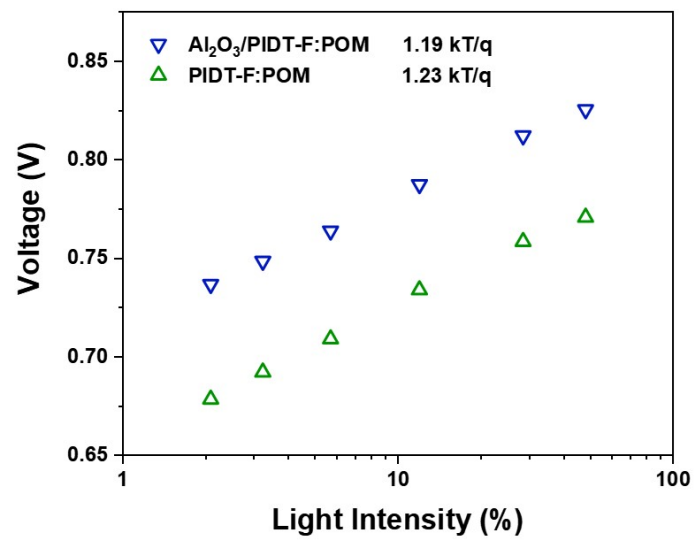

**Fig. S7.** Light intensity dependence of  $V_{OC}$  of PIDT-F:POM and Al<sub>2</sub>O<sub>3</sub>/PIDT-F:POM based devices.



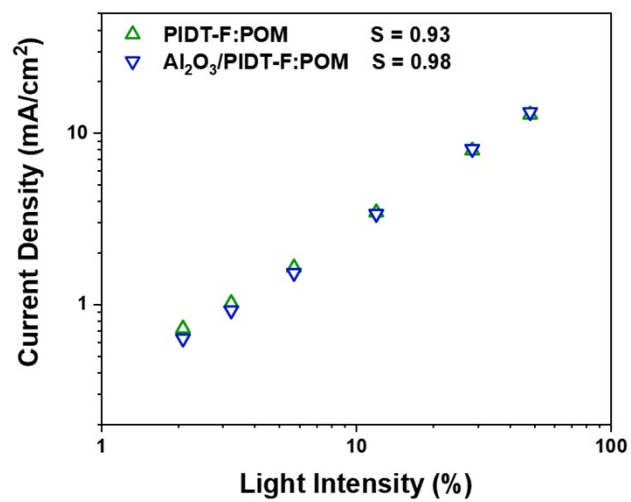

**Fig. S8.** Light intensity dependence of  $J_{SC}$  of PIDT-F:POM and  $\text{Al}_2\text{O}_3/\text{PIDT-F:POM}$  based devices.

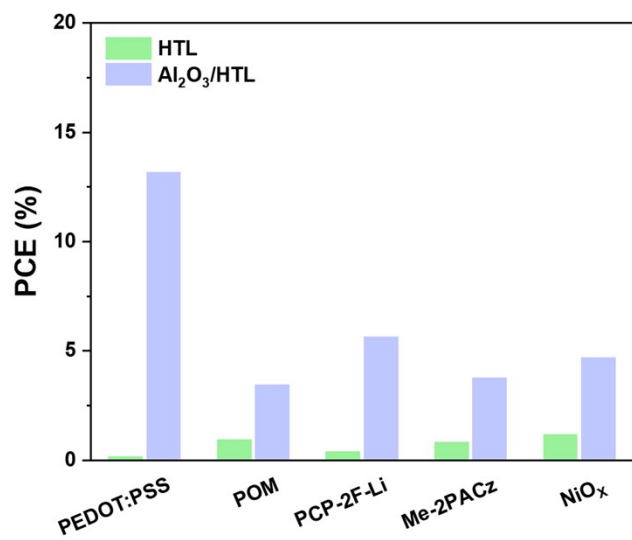

**Fig. S9.** PCE of inverted OSCs based on different HTLs with or without the Al<sub>2</sub>O<sub>3</sub> buffer layer.

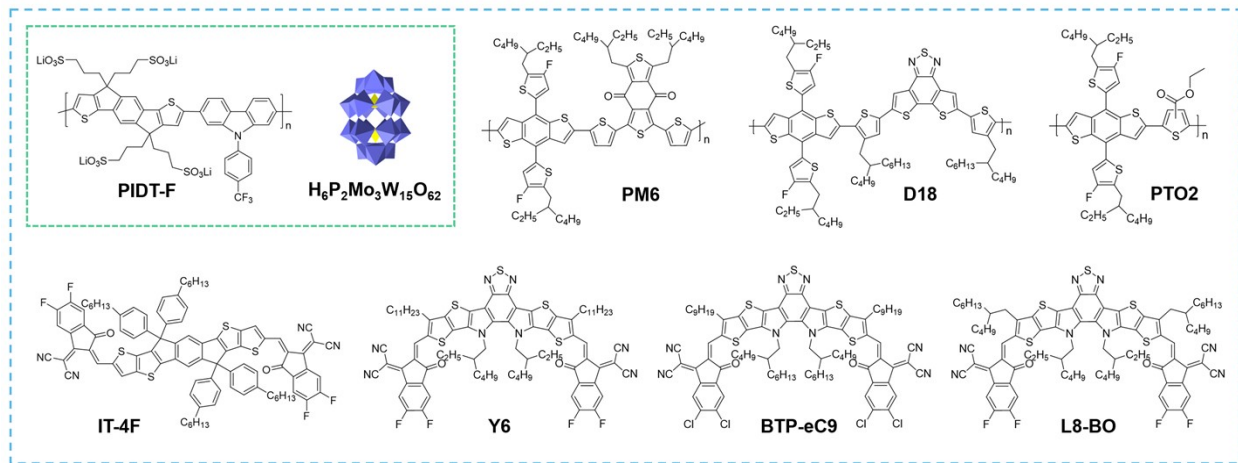

**Fig. S10.** The chemical structures of PIDT-F, POM, and active layer materials.

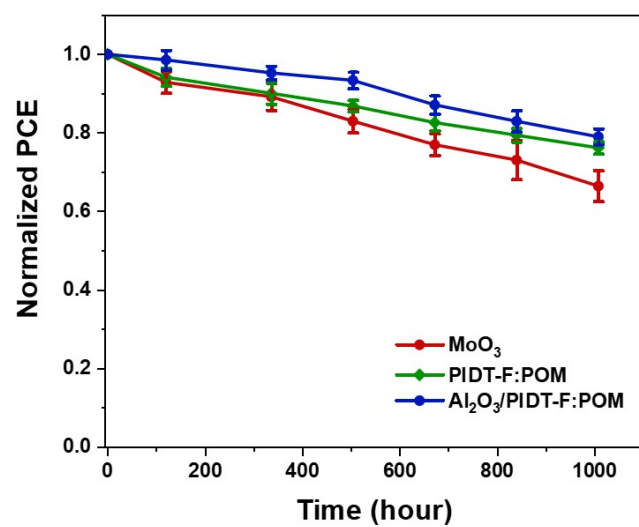

**Fig. S11.** The storage stability with variance of MoO<sub>3</sub> and Al<sub>2</sub>O<sub>3</sub>/PIDT-F:POM based devices with encapsulation (Fig. 4c).

**Table 1.** Photovoltaic parameters of conventional OSCs based on PM6:BTP-eC9 using different HTLs.

| HTL        | $V_{oc}$ (V) | $J_{sc}$ (mA/cm <sup>2</sup> ) | FF    | PCE (%) <sup>a)</sup> |
|------------|--------------|--------------------------------|-------|-----------------------|
| PEDOT:PSS  | 0.847        | 26.9                           | 0.766 | 17.5 (17.3±0.2%)      |
| PIDT-F:POM | 0.855        | 26.8                           | 0.771 | 17.6 (17.5±0.2%)      |

<sup>a)</sup> The average values are calculated based on 12 individual devices shown in the brackets.

**Table S2.** Photovoltaic parameters of inverted OSCs based on PM6:BTP-eC9 using different HTLs.

| HTL                                        | $V_{oc}$ (V) | $J_{sc}$ (mA/cm <sup>2</sup> ) | FF    | PCE (%) <sup>a)</sup> |
|--------------------------------------------|--------------|--------------------------------|-------|-----------------------|
| MoO <sub>3</sub>                           | 0.838        | 26.9                           | 0.743 | 16.7 (16.2±0.3%)      |
| PIDT-F:POM                                 | 0.815        | 26.6                           | 0.733 | 15.9 (15.8±0.1%)      |
| Al <sub>2</sub> O <sub>3</sub> /PIDT-F:POM | 0.849        | 27.0                           | 0.752 | 17.2 (17.1±0.1%)      |

a) The average values are calculated based on 12 individual devices shown in the brackets.

**Table S3.** The photovoltaic parameters of inverted devices with different HTLs.

| HTL                                              | $V_{oc}$ (V) | $J_{sc}$ (mA/cm <sup>2</sup> ) | FF   | PCE (%) |
|--------------------------------------------------|--------------|--------------------------------|------|---------|
| PEDOT:PSS                                        | 0.05         | 12.5                           | 0.26 | 0.15    |
| Al <sub>2</sub> O <sub>3</sub> /PEDOT:PSS        | 0.79         | 25.4                           | 0.68 | 13.2    |
| PCP-2F-Li                                        | 0.19         | 6.57                           | 0.31 | 0.39    |
| Al <sub>2</sub> O <sub>3</sub> /PCP-2F-Li        | 0.47         | 23.4                           | 0.51 | 5.65    |
| Me-2PACz                                         | 0.13         | 19.3                           | 0.33 | 0.82    |
| Al <sub>2</sub> O <sub>3</sub> /Me-2PACz         | 0.39         | 22.6                           | 0.43 | 3.78    |
| NiO <sub>x</sub>                                 | 0.16         | 19.8                           | 0.36 | 1.17    |
| Al <sub>2</sub> O <sub>3</sub> /NiO <sub>x</sub> | 0.43         | 23.22                          | 0.47 | 4.70    |

**Table S4.** The photovoltaic parameters of inverted devices with different active layers.

| Active layer  | HTL                                        | $V_{oc}$ (V) | $J_{sc}$ (mA/cm <sup>2</sup> ) | FF   | PCE (%) |
|---------------|--------------------------------------------|--------------|--------------------------------|------|---------|
| PM6:IT-4F     | MoO <sub>3</sub>                           | 0.85         | 19.1                           | 0.75 | 12.2    |
|               | Al <sub>2</sub> O <sub>3</sub> /PIDT-F:POM | 0.85         | 19.5                           | 0.75 | 12.5    |
| PTO2:IT-4F    | MoO <sub>3</sub>                           | 0.90         | 20.3                           | 0.70 | 12.8    |
|               | Al <sub>2</sub> O <sub>3</sub> /PIDT-F:POM | 0.91         | 20.7                           | 0.71 | 13.4    |
| PM6:Y6        | MoO <sub>3</sub>                           | 0.83         | 25.8                           | 0.74 | 15.9    |
|               | Al <sub>2</sub> O <sub>3</sub> /PIDT-F:POM | 0.84         | 25.7                           | 0.75 | 16.2    |
| PM6:D18:L8-BO | MoO <sub>3</sub>                           | 0.88         | 26.4                           | 0.75 | 17.5    |
|               | Al <sub>2</sub> O <sub>3</sub> /PIDT-F:POM | 0.89         | 27.0                           | 0.76 | 18.4    |



**Table S5.** Some representative inverted OSCs with solution-processed HTLs.

| BHJ                                       | HTL                                     | $V_{oc}$ (V) | $J_{sc}$ (mA/cm <sup>2</sup> ) | FF         | PCE (%)   | DOI                           |
|-------------------------------------------|-----------------------------------------|--------------|--------------------------------|------------|-----------|-------------------------------|
| P3HT:PCBM                                 | NiO                                     | 0.58         | 10.07                          | 51         | 3.01      | 10.5012/bkcs.2011.32.3.1067   |
| a-PTPTBT:PCBM                             | VO <sub>x</sub>                         | 0.82         | 11.6                           | 53         | 5.0       | 10.1002/adma.201102142        |
| P3HT:PCBM                                 | PEDOT:CFS-31                            | 0.607        | 7.8                            | 65.4       | 3.1       | 10.1039/c2jm35646e            |
| PTB7-F20:PC <sub>71</sub> BM              | PEDOT:PSS + Au NPs                      | 0.640        | 17.068                         | 64.0       | 7.430     | 10.1039/c2ee23359b            |
| P3HT:PCBM                                 | AgNPs                                   | 0.386        | 7.39                           | 38.5       | 1.1       | 10.7567/JJAP.52.04CR13        |
| P3HT:PCBM                                 | PFT-3HT                                 | 0.60         | 11.3                           | 64.9       | 4.6       | 10.1021/cm400297p             |
| PSEHTT:ICBA                               | Polyaniline (PANI)                      | 0.89         | 11.60                          | 66.87      | 6.87      | 10.1039/c3nr03011c            |
| P3HT:PCBM                                 | V <sub>2</sub> O <sub>5</sub>           | 0.563±0.015  | 10.69±0.38                     | 50.49±1.90 | 3.09±0.18 | 10.1039/c3ee42204f            |
| PTB7:PC <sub>71</sub> BM                  | MoS <sub>2</sub>                        | 0.72         | 15.90                          | 71         | 8.11      | 10.1002/aenm201300549         |
| PTTh <sub>4</sub> FBT:PC <sub>71</sub> BM | sGO/VO <sub>x</sub>                     | 0.76         | 13.2                           | 67         | 6.7       | 10.1002/aenm.201300430        |
| P3HT:ICBA                                 | PEDOT:PSS CPP                           | 0.79±0.01    | 9.2±0.4                        | 56±2       | 4.0±0.3   | 10.1002/adfm.201303232        |
| PTB7:PC <sub>71</sub> BM                  | tungsten carbide (WC)                   | 0.72         | 15.98                          | 70         | 8.04      | 10.1039/c3ta13473c            |
| PIDTT-DFBT-TT:PC <sub>71</sub> BM         | graphene oxide (GO)                     | 0.958        | 11.6                           | 49.3       | 5.50      | 10.1002/adfm.201302426        |
| P3HT:PCBM                                 | PEDOT:PSS                               | 0.540        | 9.13                           | 62.9       | 3.10      | 10.1016/j.solmat.2014.07.007  |
| P3HT:IC <sub>70</sub> BA                  | PEDOT:PSS:V <sub>2</sub> O <sub>5</sub> | 0.87         | 7.53                           | 64.1       | 4.20      | 10.1016/j.solmat.2013.09.009  |
| P3HT:PCBM                                 | PEDOT:PSS-AuNP                          | 0.47         | 6.2                            | 48         | 1.4       | 10.1002/pssa.201330674        |
| P3HT:PCBM                                 | TiOPc                                   | 0.48         | 3.5                            | 50         | 0.84      | 10.1002/pssa.201431068        |
| P3HT:PC <sub>60</sub> BM                  | Nafion-modified MoO <sub>x</sub>        | 0.60         | 9.65                           | 60.34      | 3.49      | 10.1021/am507459t             |
| P3HT:PCBM                                 | V <sub>2</sub> O <sub>5</sub>           | 0.570        | 3.20                           | 30         | 0.55      | 10.1016/j.optmat.2015.10.036  |
| P3HT:PCBM                                 | CoO <sub>x</sub>                        | 0.57         | 8.95                           | 53         | 2.72      | 10.1088/0268-1242/30/5/055001 |
| P3HT:PC <sub>61</sub> BM                  | V <sub>2</sub> O <sub>5</sub>           | 0.60         | 9.22                           | 58.02      | 3.21      | 10.1038/lisa.2015.46          |
| PTB7:PC <sub>61</sub> BM                  | MoO <sub>3</sub> :PEDOT:PSS             | 0.74         | 12.7                           | 63         | 5.92      | 10.1021/am509049t             |

|                                 |                                            |             |            |            |                       |                               |
|---------------------------------|--------------------------------------------|-------------|------------|------------|-----------------------|-------------------------------|
| P3HT:PC <sub>61</sub> BM        | V <sub>2</sub> O <sub>x</sub>              | 0.58±0.02   | 8.22±0.51  | 61±3       | 2.89±0.21             | 10.1063/1.4966806             |
| PCE-10:PC <sub>60</sub> BM      | PEDOT:PSS:MoO <sub>x</sub>                 | 0.78        | 14.99      | 63         | 7.39                  | 10.1002/aenm.201601959        |
| P3HT:PC <sub>70</sub> BM        | PEDOT:PSS:ZD                               | 0.582±0.007 | 9.26±0.38  | 58.26±2.56 | 3.16±0.15             | 10.1021/acsami.7b01183        |
| PffBT4T-2OD:PC <sub>71</sub> BM | PMA:PEDOT:PSS                              | 0.77        | 18.4       | 64         | 9.07                  | 10.1021/acsami.7b13346        |
| PTB7-Th:PC <sub>71</sub> BM     | L-GO:NiO <sub>x</sub>                      | 0.78±0.00   | 19.16±0.33 | 65±1       | 9.73±0.08<br>(9.93)   | 10.1002/adfm.201706403        |
| PTB7-Th:PC <sub>71</sub> BM     | Graphene-MoS <sub>2</sub>                  | 0.80        | 17.1       | 67.7       | 9.5                   | 10.1016/j.carbon.2018.10.038  |
| SMD2:ITIC-Th                    | WO <sub>3</sub> /PEDOT:PSS                 | 0.899       | 17.3       | 66.0       | 10.3                  | 10.1002/aenm.201902065        |
| PBDB-T-2F:IDIC:Y6               | H <sub>x</sub> MoO <sub>3</sub> /PEDOT:PSS | 0.83        | 21.0       | 0.68       | 11.9                  | 10.1002/adma.201907840        |
| PTB7-Th:EH-IDTBR                | S-FrGO                                     | 1.00        | 15.46      | 59.8       | 9.27                  | 10.1021/acsami.0c11384        |
| PBDB-T-2F:IT-4F                 | Cu-NiO <sub>x</sub> (12.2%)+F4-TCNQ        | 0.827       | 18         | 53.3       | 7.92                  | 10.1039/d0qm00619j            |
| PTB7:PC <sub>71</sub> BM        | VO <sub>x</sub> -PEDOT                     | 0.80        | 20.06      | 54         | 8.6                   | 10.1038/s41598-021-93365-8    |
| PTB7-Th:IEICO-4F                | NiO                                        | 0.719       | 23.99      | 65.1       | 11.23                 | 10.1002/sml.202101729         |
| PM6:PC <sub>71</sub> BM:BTP-eC9 | PEDOT:F                                    | 0.85        | 26.01      | 77         | 17.02                 | 10.1038/s41560-022-00997-9    |
| PBDB-T-2F:Y6                    | Cl <sub>2</sub> -CuSCN                     | 0.84        | 25.5       | 72.0       | 15.4                  | 10.1021/acsenergylett.2c01545 |
| P3HT:PCBM                       | m-PEDOT:PSS/GO                             | 0.62        | 13.00      | 51.14      | 4.13                  | 10.1016/j.orgel.2021.106388   |
| PV2000:PC <sub>71</sub> BM      | PMA:PEDOT:PSS                              | 0.804       | 15.6       | 72.2       | 9.01                  | 10.1002/aesr.202300006        |
| PM6:Y6                          | NiO <sub>x</sub> :PMMA                     | 0.853±0.006 | 24.92±0.13 | 70.33±0.45 | 14.95±0.12<br>(15.11) | 10.3390/polym15081875         |
| P3HT:PCBM                       | graphene                                   | 0.51±0.01   | 7.44±0.11  | 48±3       | 1.82±0.14<br>(2.00)   | 10.3390/mi14101858            |
| PM6:Y6                          | BCF-Li doped PCE12np                       | 0.85        | 22.29      | 0.72       | 13.66                 | 10.1021/acsenergylett.3c02087 |
| PM6:BTP-eC9:L8-BO               | D-PTAA np/PEDOT:PSS                        | 0.85        | 28.03      | 71.4       | 17.06                 | 10.1016/j.joule.2024.06.013   |

**Table S6.** The photovoltaic parameters of OSCs with different HTLs.

| Device structure-HTL <sup>a)</sup>                         | V <sub>oc</sub> (V) | J <sub>sc</sub> (mA/cm <sup>2</sup> ) | FF   | PCE (%) |
|------------------------------------------------------------|---------------------|---------------------------------------|------|---------|
| <i>c</i> -PIDT-F                                           | 0.81                | 27.2                                  | 0.59 | 13.0    |
| <i>i</i> -PIDT-F                                           | 0.37                | 25.9                                  | 0.36 | 3.51    |
| <i>i</i> -Al <sub>2</sub> O <sub>3</sub> /PIDT-F           | 0.64                | 26.4                                  | 0.61 | 10.2    |
| <i>c</i> -PIDT-F:POM (1:1)                                 | 0.84                | 26.3                                  | 0.77 | 17.0    |
| <i>i</i> -PIDT-F:POM (1:1)                                 | 0.73                | 26.7                                  | 0.43 | 8.41    |
| <i>i</i> -Al <sub>2</sub> O <sub>3</sub> /PIDT-F:POM (1:1) | 0.83                | 26.1                                  | 0.72 | 15.6    |
| <i>c</i> -PIDT-F:POM (1:2)                                 | 0.84                | 26.6                                  | 0.77 | 17.3    |
| <i>i</i> -PIDT-F:POM (1:2)                                 | 0.81                | 26.9                                  | 0.73 | 15.8    |
| <i>i</i> -Al <sub>2</sub> O <sub>3</sub> /PIDT-F:POM (1:2) | 0.84                | 27.0                                  | 0.76 | 17.1    |
| <i>c</i> -PIDT-F:POM (1:3)                                 | 0.86                | 26.8                                  | 0.77 | 17.6    |
| <i>i</i> -PIDT-F:POM (1:3)                                 | 0.81                | 26.6                                  | 0.73 | 15.9    |
| <i>i</i> -Al <sub>2</sub> O <sub>3</sub> /PIDT-F:POM (1:3) | 0.85                | 27.0                                  | 0.75 | 17.2    |
| <i>c</i> -PIDT-F:POM (1:5)                                 | 0.84                | 26.7                                  | 0.78 | 17.5    |
| <i>i</i> -PIDT-F:POM (1:5)                                 | 0.80                | 26.5                                  | 0.72 | 15.2    |
| <i>i</i> -Al <sub>2</sub> O <sub>3</sub> /PIDT-F:POM (1:5) | 0.84                | 27.2                                  | 0.72 | 16.6    |
| <i>c</i> -POM                                              | 0.85                | 26.4                                  | 0.78 | 17.4    |
| <i>i</i> -POM                                              | 0.12                | 22.5                                  | 0.34 | 0.94    |
| <i>i</i> -Al <sub>2</sub> O <sub>3</sub> /POM              | 0.31                | 25.6                                  | 0.43 | 3.46    |

<sup>a)</sup> *c*- for conventional structure (ITO/HTL/PM6:BTP-eC9/PFN-Br/Ag); *i*- for inverted structure (ITO/ZnO/PM6:BTP-eC9/HTL/Ag).

**Table S7.** The photovoltaic parameters of 1cm<sup>2</sup> OSC based on PM6:BTP-eC9.

| HTL        | V <sub>oc</sub> (V) | J <sub>sc</sub> (mA/cm <sup>2</sup> ) | FF   | PCE (%) |
|------------|---------------------|---------------------------------------|------|---------|
| PIDT-F:POM | 0.85                | 27.2                                  | 0.72 | 16.6    |

The compatibility of PIDT-F:POM with large-area blade-coating techniques is investigated. First, we prepare a PIDT-F:POM film via blade-coating and characterize its surface morphology by AFM. As shown in Supplementary Fig. 4, the blade-coated PIDT-F:POM film exhibits a smooth surface with a low  $R_q$  of 1.29 nm, which is quite similar to the spin-coated film. The 1 cm<sup>2</sup> OSC device with the blade-coated PIDT-F:POM shows a decent PCE of 16.6%. (Supplementary Table 5) The results imply that PIDT-F:POM is compatible with the large-area processing method, making it a promising candidate for practical application.
